# Supplementary material for: An integrated genetic analysis of epileptogenic brain malformed lesions
Source: PubMed Central journal article supplement (PMC9983246; doi:10.1186/s40478-023-01532-x), 2023-03-02
Supplement: 40478_2023_1532_MOESM1_ESM.pdf [file 40478_2023_1532_MOESM1_ESM.pdf]

Supplementary information

## **An integrated genetic analysis of epileptogenic brain malformed lesions**

Atsushi Fujita,<sup>1</sup> Mitsuhiro Kato,<sup>2</sup> Hidenori Sugano,<sup>3</sup> Yasushi Iimura,<sup>3</sup> Hiroharu Suzuki,<sup>3</sup> Jun Tohyama,<sup>4</sup> Masafumi Fukuda,<sup>5</sup> Yosuke Ito,<sup>5</sup> Shimpei Baba,<sup>6</sup> Tohru Okanishi,<sup>7</sup> Hideo Enoki,<sup>8</sup> Ayataka Fujimoto,<sup>9</sup> Akiyo Yamamoto,<sup>10</sup> Kentaro Kawamura,<sup>10</sup> Shinsuke Kato,<sup>10</sup> Ryoko Honda,<sup>11</sup> Tomonori Ono,<sup>12</sup> Hideaki Shiraishi,<sup>13</sup> Kiyoshi Egawa,<sup>13</sup> Kentaro Shirai,<sup>14</sup> Shinji Yamamoto,<sup>15</sup> Itaru Hayakawa,<sup>16</sup> Hisashi Kawawaki,<sup>17</sup> Ken Saida,<sup>1</sup> Naomi Tsuchida,<sup>1,18</sup> Yuri Uchiyama,<sup>1,18</sup> Kohei Hamanaka,<sup>1</sup> Satoko Miyatake,<sup>1,19</sup> Takeshi Mizuguchi,<sup>1</sup> Mitsuko Nakashima,<sup>1,20</sup> Hiroto Saito,<sup>1,20</sup> Noriko Miyake,<sup>1,21</sup> Akiyoshi Kakita,<sup>22</sup> Naomichi Matsumoto<sup>1\*</sup>

Correspondence to: Naomichi Matsumoto

Department of Human Genetics, Yokohama City University Graduate School of Medicine

3-9 Fukuura, Kanazawa-ku, Yokohama 236-0004, Japan

E-mail [naomat@yokohama-cu.ac.jp](mailto:naomat@yokohama-cu.ac.jp)

Tel +81-45-787-2606

Fax +81-45-786-5219

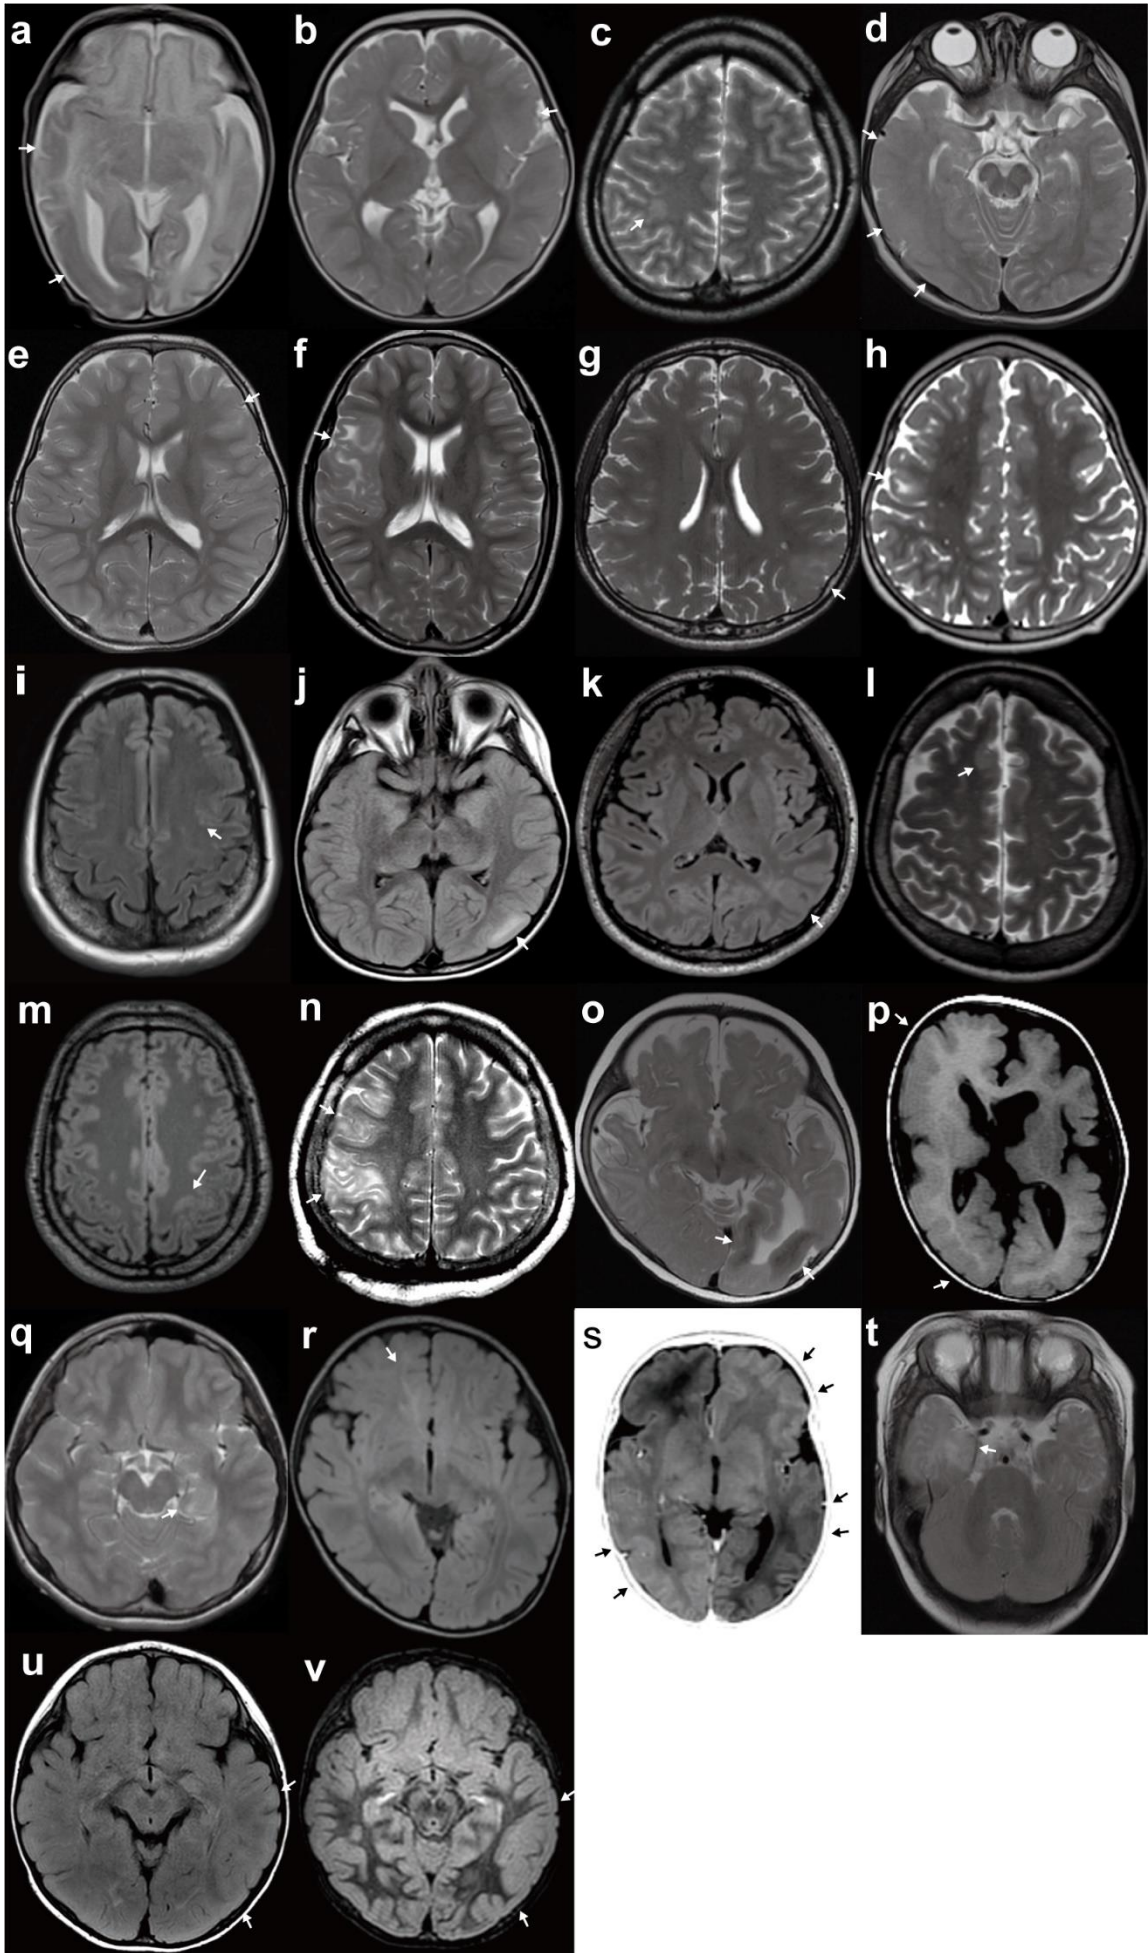

**Fig. S1 Brain MRI studies of patients harboring pathogenic variants in this study** (a) Patient F53 at the age of 20 days, (b) patient F72 at 15 months, (c) patient F04 at 27 years, (d) patient F36 at 16 months, (e) patient F38 at 2 years, (f) patient F40 at 13 years, (g) patient F41 at 13 years, (h) patient F44 at 6 years, (i) patient F46 at 39 years, (j) patient F49 at 4 years, (k) patient F50 at 25 years, (l) patient F54 at 53 years, (m) patient F57 at 15 years, (n) patient F64 at 56 years, (o) patient F68 at 9 months, (p) patient F26 at 1 year, (q) patient F32 at 12 years, (r) patient F45 at 1 year, (s) patient F29 at 3 days, (t) patient F39 at 5 months, and (u, v) patient F63 at 16 months. T2-weighted brain MRI (a-h, j-l, n, o, q, t, and u), fluid-attenuated inversion recovery (i, m, r), T1-weighted MRI (p), T2-reversed MRI (s), and double inversion recovery MRI (v) are shown. Brain MRI showed bilateral (p and s) or focal (others) irregular gyri (arrows) with blurred junctions between the cortex and white matter (b, d, e, and g) or hyperintensity of the subcortical white matter (c, f, h, i, j, k, m, n, q, r, and t).

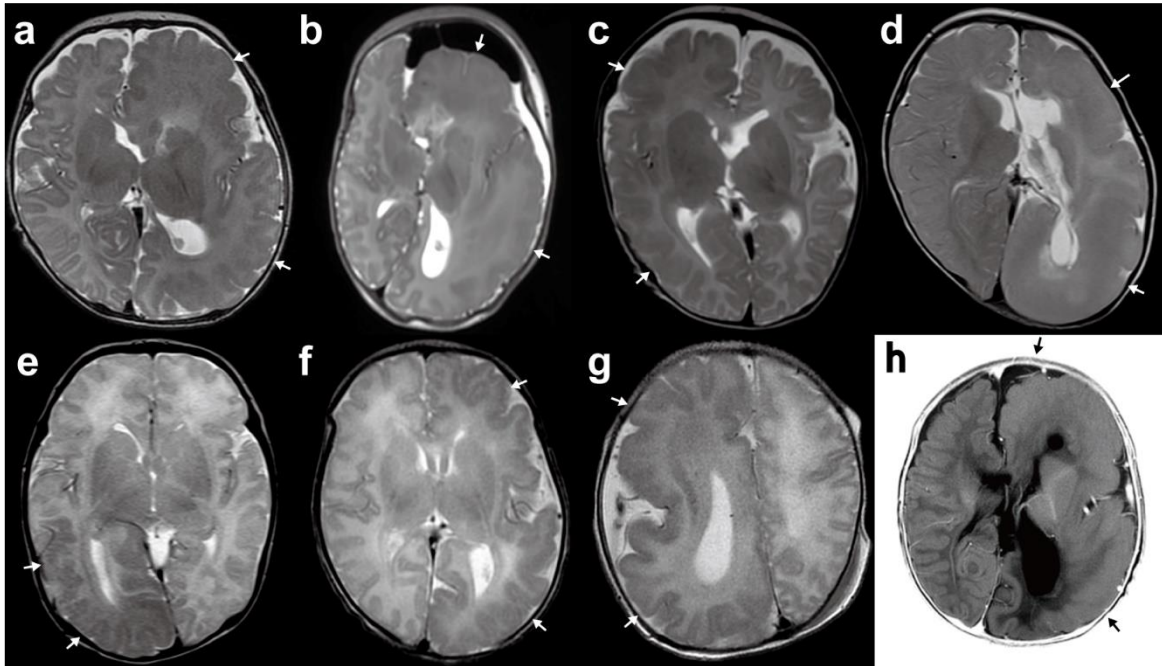

**Fig. S2 Brain MRI studies of patients with hemimegalencephaly harboring somatic variants** (a) Patient M28 at the age of 1 month, (b) patient M29 at 2 months, (c) patient M30 at 2 months, (d) patient M44 at 14 months, (e) patient M53 at 2 days, (f) patient M54 at 11 days, (g) patient M55 at 1 day, and (h) patient M56 at 3 months. T2-weighted brain MRI (a-g) and T2-reversed MRI (h) are shown. Brain MRI showing hemispherical irregular gyri (arrows) with blurred junctions between the cortex and white matter (a, b, c, d, g, and h). The patients showed hemispherical hypertrophy compatible with hemimegalencephaly.

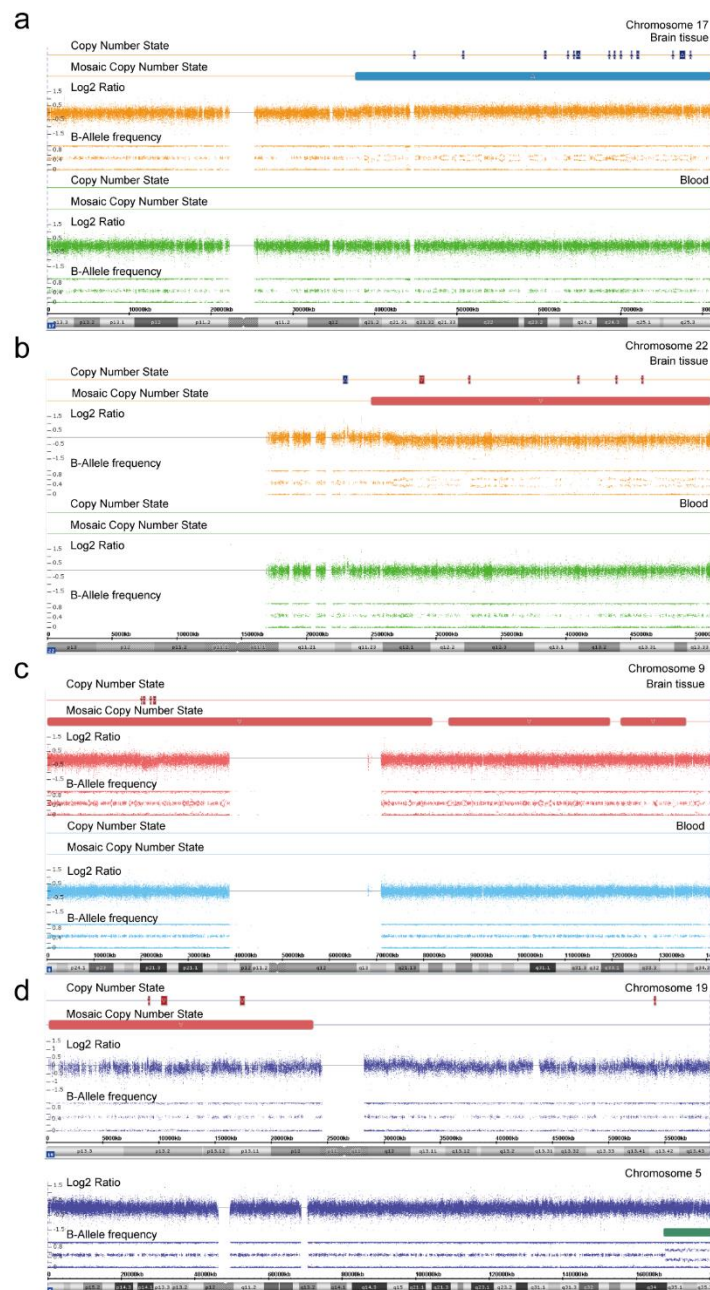

**Fig. S3 Results of the SNP array in three patients in this study (a) Somatic duplication at 17q12-q25.3 and (b) somatic deletion at 22q11.23-q13.33 only in the brain of patient F43. Yellow and green plots show data from the brain and blood, respectively. (c) Somatic deletion of the entire chromosome 9 in the brain of patient F70. Pink and light blue plots show the data from the brain and blood, respectively. (d) Somatic deletion at 19p13.3-p12 (upper panel) and somatic copy-neutral loss of heterozygosity at 5q34-q35.3 (lower panel) in the brain of patient F30. Horizontal bars show a mosaic loss in red, mosaic gain in blue, and mosaic copy-neutral loss of heterozygosity in green.**



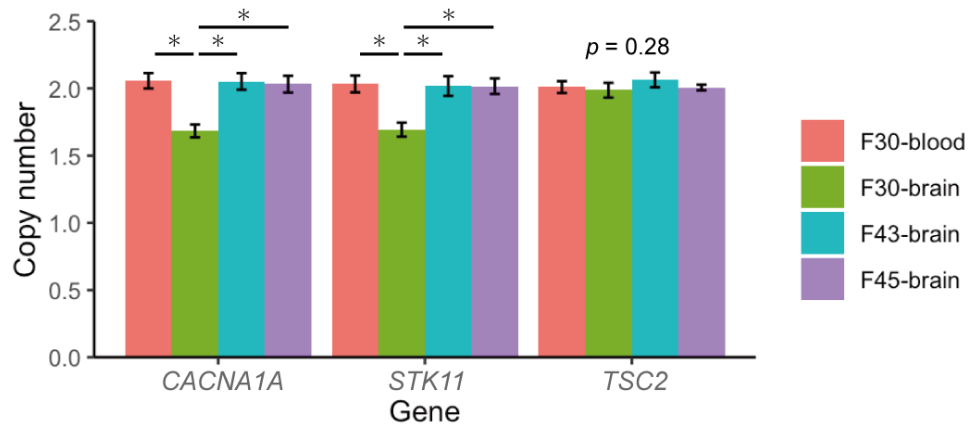

**Fig. S4 Confirmation of somatic deletion of chromosome 19 in affected brain tissue from patient F30 using ddPCR** *CACNA1A* at 19p13.13 and *STK11* at 19p13.3 were mapped within the somatic deletion observed using the SNP array. *TSC2* at 16p13.3 was used as a non-deleted control gene. *CACNA1A* and *STK11* are associated with epilepsy and hamartoma, respectively. Three technical replicate measurements were repeated three times for *CACNA1A* and *STK11*, and one time for *TSC2*. The data were normalized to that of the F45 brain. Statistical evaluation was performed using one-way ANOVA followed by Dunnett's post-hoc test. Data presented as mean  $\pm$  SD; \*,  $P < 0.0001$ .

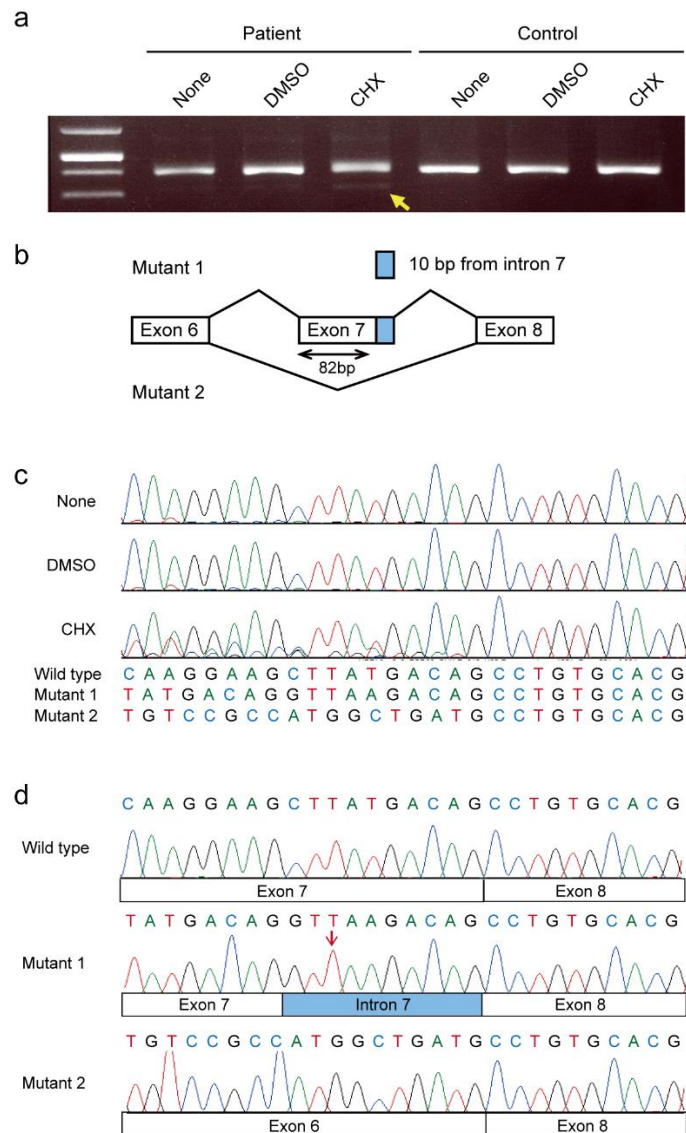

**Fig. S5 cDNA analysis of a somatic splicing variant of *NPRL3* in lymphoblastoid cells from patient F38** The splice variant c.629+2\_3insT of *NPRL3* showed skipping exon 7 or retention of 10 bp of intron 7. Cycloheximide (CHX) treatment determined the nonsense-mediated mRNA decay of both mutant products. **(a)** Agarose gel electrophoresis of reverse transcriptase (RT)-PCR products. The arrow shows an exon 7 skipping band (82 bp deletion). **(b)** Schematic representation of the splicing change caused by c.629+2\_3insT, resulting in NM\_001077350: r.[548\_629del, 629\_630ins[629+1\_629+2;u:629+3\_629+9]]. **(c)** Sanger sequencing of RT-PCR products. **(d)** Sanger sequencing of TA-cloning from RT-PCR products of a CHX-treated sample. The red arrow in Mutant 1 shows the variant position of c.629+2\_3insT. DMSO, Dimethyl sulfoxide.

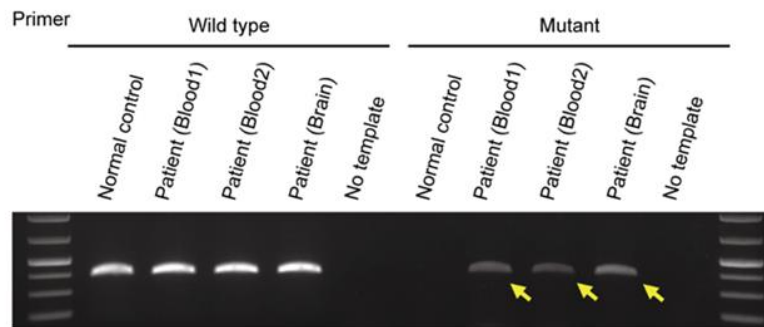

**Fig. S6 Allele-specific PCR for *TSC2* somatic variant in the peripheral blood leukocytes from patient F68** Deep sequencing identified c.1418\_1422del (p.Leu473Hisfs\*7) of *TSC2* with a VAF of 3.6% in brain tissue, while the allele frequency was 0.03–0.4% in peripheral blood leukocytes. Allele-specific PCR confirmed the very-low-frequency variant in peripheral blood leukocytes and the brain (arrows). Blood 2 was re-extracted from stored frozen Blood 1.



**Table S1 Pathological types and genetic analyses of the 64 patients enrolled in this study**

| ID               | Pathological type                                                 | DNA: Blood/Saliva | DNA: Brain | TS: Haloplex | TS: xGen | WES: Blood/Saliva | WES: Brain | Microarray | Aberrant gene               |
|------------------|-------------------------------------------------------------------|-------------------|------------|--------------|----------|-------------------|------------|------------|-----------------------------|
| F02 <sup>a</sup> | FCD type IIB                                                      | +Saliva           | +          | -            | +        | +                 | +          | -          |                             |
| F04 <sup>a</sup> | FCD type IIB                                                      | +                 | +          | -            | -        | +                 | +          | -          | <i>TUBB3</i> <sup>o</sup>   |
| F06 <sup>a</sup> | FCD type IIB                                                      | +                 | +          | -            | +        | +                 | +          | +          |                             |
| F08 <sup>a</sup> | FCD type IIB                                                      | +                 | +          | +            | -        | +                 | +          | +          | <i>MTOR</i>                 |
| F09 <sup>a</sup> | FCD type IIB                                                      | +                 | +          | +            | +        | +                 | +          | +          |                             |
| F11 <sup>a</sup> | FCD type IIA                                                      | +Saliva           | +          | +            | +        | +                 | +          | +          |                             |
| F12 <sup>a</sup> | FCD type IIA                                                      | +                 | +          | +            | +        | +                 | +          | +          |                             |
| F13 <sup>a</sup> | FCD type IIA                                                      | +                 | +          | +            | +        | +                 | +          | +          |                             |
| F14 <sup>a</sup> | FCD type IIA                                                      | +Saliva           | +          | +            | +        | +                 | +          | +          |                             |
| F15 <sup>a</sup> | FCD type IIA                                                      | +Saliva           | +          | +            | +        | +                 | +          | +          |                             |
| F16 <sup>a</sup> | FCD type IIB                                                      | +                 | +          | -            | +        | +                 | +          | -          |                             |
| F19 <sup>a</sup> | FCD type IIB                                                      | +                 | +          | +            | +        | +                 | +          | +          |                             |
| F20 <sup>a</sup> | FCD type I                                                        | +Saliva           | +          | +            | +        | +                 | +          | +          |                             |
| F21 <sup>a</sup> | FCD type I                                                        | +Saliva           | +          | +            | +        | +                 | +          | -          |                             |
| F22 <sup>a</sup> | FCD type I                                                        | +                 | +          | +            | +        | +                 | +          | +          |                             |
| F23 <sup>a</sup> | FCD type I                                                        | +                 | +          | +            | +        | +                 | +          | +          |                             |
| F24 <sup>a</sup> | FCD type I                                                        | +Saliva           | +          | +            | +        | +                 | +          | +          |                             |
| F25 <sup>a</sup> | FCD type I                                                        | +                 | +          | +            | +        | +                 | +          | +          |                             |
| F26              | FCD type IIB                                                      | +                 | +FFPE      | -            | -        | +                 | +          | -          | <i>AKT3</i>                 |
| F29              | MCD                                                               | +                 | +FFPE      | -            | -        | -                 | +          | -          | <i>MTOR</i>                 |
| F30              | Hippocampal sclerosis                                             | +                 | +          | +            | +        | +                 | +          | +          | chr19p del                  |
| F31              | Astrocytoma grade 1                                               | +                 | +          | -            | +        | +                 | +          | +          |                             |
| F32              | FCD type IIB                                                      | +                 | +          | +            | -        | -                 | -          | -          | <i>BRAF</i>                 |
| F33              | FCD type IIB                                                      | +                 | +          | +            | +        | +                 | +          | +          |                             |
| F34              | Polymicrogyria                                                    | +                 | +          | -            | +        | +                 | +          | +          |                             |
| F36              | FCD type IIB                                                      | +                 | +          | +            | -        | -                 | -          | -          | <i>TSC2</i>                 |
| F38              | FCD type IIB                                                      | +                 | +          | +            | -        | -                 | -          | -          | <i>NPRL3</i>                |
| F39              | FCD type IIB<br>(Ganglioglioma and FCD type IA)                   | +                 | +          | +            | -        | -                 | -          | -          | <i>BRAF</i>                 |
| F40              | FCD type IIB                                                      | +                 | +          | +            | +        | +                 | +          | +          | <i>MTOR</i>                 |
| F41              | FCD type IIB                                                      | +                 | +          | +            | +        | +                 | +          | +          | <i>TSC2</i>                 |
| F43              | FCD type IIB                                                      | +                 | +          | +            | +        | +                 | +          | +          | <i>DEPDC5</i> and <i>SV</i> |
| F44              | FCD type IIB                                                      | +                 | +          | +            | -        | -                 | -          | -          | <i>TSC2</i>                 |
| F45              | FCD type I                                                        | +                 | +          | +            | -        | +                 | +          | -          | <i>SLC35A2</i>              |
| F46              | FCD type IIB                                                      | +                 | +          | +            | -        | -                 | -          | -          | <i>MTOR</i>                 |
| F48              | FCD type IIB                                                      | +                 | +          | +            | +        | -                 | -          | -          | <i>MAP2K1</i>               |
| F49              | FCD type IIB                                                      | +                 | +          | +            | -        | -                 | -          | -          | <i>TSC2</i>                 |
| F50              | FCD type IIB                                                      | +                 | +          | +            | -        | -                 | -          | -          | <i>MTOR</i>                 |
| F53              | FCD type IIA                                                      | +                 | +          | +            | -        | -                 | -          | -          | <i>DEPDC5</i> <sup>o</sup>  |
| F54              | FCD type IIB                                                      | +                 | +          | +            | -        | -                 | -          | -          | <i>MTOR</i>                 |
| F55              | FCD type IIA                                                      | +                 | +          | +            | +        | +                 | +          | +          |                             |
| F56              | FCD type IIA                                                      | +                 | +          | +            | +        | +                 | +          | -          |                             |
| F57              | FCD type IIB                                                      | +                 | +          | +            | -        | -                 | -          | -          | <i>MTOR</i>                 |
| F61              | FCD type IIB                                                      | +                 | +          | +            | +        | -                 | -          | -          | <i>TSC2</i> <sup>l</sup>    |
| F62              | FCD type IIA                                                      | +                 | +          | +            | +        | +                 | +          | -          |                             |
| F63              | No remarkable change <sup>e</sup><br>(insufficient sample volume) | +                 | +          | +            | -        | -                 | -          | -          | <i>NPRL3</i> <sup>o</sup>   |
| F64 <sup>b</sup> | FCD type IIB                                                      | -                 | +          | +            | -        | -                 | -          | -          | <i>MTOR</i>                 |
| F65              | No remarkable change <sup>e</sup><br>(insufficient sample volume) | +                 | +          | +            | +        | +                 | +          | -          |                             |
| F66              | Pilocytic astrocytoma                                             | +                 | +          | +            | +        | +                 | +          | -          |                             |
| F67              | FCD type I                                                        | +                 | +          | +            | -        | +                 | +          | -          | <i>PTPN11</i>               |
| F68              | FCD type IIB, TSC                                                 | +                 | +          | +            | -        | -                 | -          | -          | <i>TSC2</i>                 |
| F69              | Microscopic MCD                                                   | +                 | +          | +            | +        | +                 | +          | -          |                             |
| F70              | Ganglioglioma                                                     | +                 | +          | +            | +        | +                 | +          | +          | <i>TSC1</i> (chr9 del)      |
| F71              | FCD type IIB                                                      | +                 | +          | +            | +        | +                 | +          | -          |                             |
| F72              | FCD type IIA                                                      | -                 | +FFPE      | -            | +        | -                 | -          | -          | <i>PIK3CA</i>               |
| M28              | No remarkable change<br>(insufficient sample volume) <sup>d</sup> | +                 | +          | +            | -        | -                 | -          | -          | <i>PIK3CA</i>               |
| M29              | HME                                                               | +                 | +          | +            | -        | -                 | -          | -          | <i>PIK3CA</i>               |
| M30              | Atypical neuron,<br>compatible with HME                           | +                 | +          | +            | -        | -                 | -          | -          | <i>MTOR</i>                 |
| M44              | - <sup>d</sup>                                                    | -                 | +          | +            | -        | -                 | -          | -          | <i>MTOR</i>                 |
| M50              | Microscopic MCD <sup>d</sup>                                      | +                 | +          | +            | -        | -                 | -          | -          |                             |
| M52              | - <sup>d</sup>                                                    | -                 | +          | +            | -        | -                 | -          | -          | <i>PIK3CA</i>               |
| M53              | HME                                                               | +                 | +          | -            | +        | -                 | -          | -          | <i>PIK3CA</i>               |
| M54              | No remarkable change <sup>d</sup>                                 | +                 | +          | +            | +        | -                 | -          | -          | <i>AKT3</i>                 |
| M55              | HME                                                               | +                 | +          | -            | +        | -                 | -          | -          | <i>PIK3CA</i>               |
| M56              | Polymicrogyria, nodular<br>heterotopia <sup>d</sup>               | +                 | +          | -            | -        | -                 | -          | -          | <i>PIK3CA</i>               |
| N                |                                                                   | 60                | 64         | 53           | 37       | 36                | 37         | 23         | 37                          |

+ = available or performed; - = unavailable or not tested; FFPE = formalin-fixed paraffin-embedded; MCD = malformation of cortical development; TS = targeted sequencing; WES = whole-exome sequencing

<sup>a</sup> Previously reported patients without any candidate variants by Nakashima *et al* (reference 3). <sup>b</sup> previously reported by Kato *et al* (reference 2). <sup>c</sup> clinically FCD. <sup>d</sup> clinically HME, <sup>e</sup> germline variant, <sup>l</sup> germline and somatic variants.

**Table S2 Clinical summary and genetic variants in patients with FCD or other pathological types in this study**

| ID  | Pathological type                                              | Sex | Age at onset | Seizure type                                                              | Age at Brain MRI | Location of lesion          | Age at surgery | Germline/Somatic | Gene                     | Variant                                      | Method    |            | VAF (%) in validation |                  |                                                                      | Reported/Novel variant |
|-----|----------------------------------------------------------------|-----|--------------|---------------------------------------------------------------------------|------------------|-----------------------------|----------------|------------------|--------------------------|----------------------------------------------|-----------|------------|-----------------------|------------------|----------------------------------------------------------------------|------------------------|
|     |                                                                |     |              |                                                                           |                  |                             |                |                  |                          |                                              | Detection | Validation | Control               | Blood            | Brain                                                                |                        |
| F53 | FCD type IA                                                    | M   | 2d           | FBTCS, daily                                                              | 20d              | Rt temporoparietooccipital  | 3m             | Germline         | <i>DEPDC5</i>            | c.982C>T p.(Arg328*)                         | TS        | Sanger     | NA                    | NA               | NA                                                                   | Reported               |
| F72 | FCD type IA                                                    | F   | 1y2m         | FBTCS, monthly; focal motor, hourly                                       | 1y3m             | Lt frontal                  | 2y             | Somatic          | <i>PIK3CA</i>            | c.1035T>A p.(Asn345Lys)                      | TS        | DS         | 0.1                   | NA               | 15 (proximal from seizure focus), 16.8 (intermediate), 12.8 (distal) | Reported               |
| F04 | FCD type IIB                                                   | M   | 6y           | FAS daily, FIAS FBTCS monthly                                             | 26y8m            | Rt Parietal                 | 26y9m          | Germline         | <i>TUBB3<sup>b</sup></i> | c.520A>G p.(Lys174Glu)                       | WES       | Sanger     | NA                    | NA               | NA                                                                   | Novel                  |
| F08 | FCD type IIB                                                   | M   | 2m           | FIAS daily                                                                | 3y               | Lt parietal                 | 3y             | Somatic          | <i>MTOR</i>              | c.4339_4353del p.(Ala1447_Glu1451del)        | WES       | DS         | 0                     | 0                | 1.8                                                                  | Novel                  |
| F36 | FCD type IIB                                                   | M   | 12m          | Motion arrest, daily                                                      | 1y4m             | Rt temporooccipital         | 1y5m           | Somatic          | <i>TSC2</i>              | c.2492C>T p.(Thr831Met)                      | TS        | DS         | 0.1                   | 0.1 <sup>c</sup> | 1.4                                                                  | Novel                  |
| F38 | FCD type IIB                                                   | F   | 8m           | Focal motor seizure w with ocular deviation to the right, FBTCS, w weekly | 2y               | Lt orbitofrontal            | 3y             | Somatic          | <i>NPRL3</i>             | c.629+2_3insT                                | TS        | DS         | 0                     | 32.5             | 32.9                                                                 | Novel                  |
| F40 | FCD type IIB                                                   | F   | 4y           | Motion arrest and staring, daily                                          | 13y              | Rt frontal                  | 14y            | Somatic          | <i>MTOR</i>              | c.4447T>C p.(Cys1483Arg)                     | TS        | DS         | 0                     | 0                | 0.6                                                                  | Reported               |
| F41 | FCD type IIB                                                   | M   | 6y           | FBTCS, monthly                                                            | 13y              | Lt parietal                 | 13y            | Somatic          | <i>TSC2</i>              | c.5227C>T p.(Arg1743Trp)                     | TS        | DS         | 0                     | 0                | 1                                                                    | Novel                  |
| F43 | FCD type IIB                                                   | M   | 5y           | Status epilepticus of FBTCS                                               | NA               | Rt frontal                  | 6y             | Somatic          | <i>SV</i>                | 22q11.23q13.33del (DEPDC5) and 17q12q25.3dup | WES       | CMA        | 0 (2 copies)          | 0 (2 copies)     | 20-25 (1.5 copies and 2.4 copies)                                    | Novel                  |
|     |                                                                |     |              |                                                                           |                  |                             |                | Somatic          | <i>DEPDC5</i>            | c.856C>T p.(Arg286*)                         | TS        | DS         | 0                     | 0.1 <sup>c</sup> | 1.8                                                                  | Reported               |
| F44 | FCD type IIB                                                   | M   | 0m           | Focal motor at Rt face at 0m, FBTCS at 3y, w weekly                       | 6y               | Rt frontal                  | 6y             | Somatic          | <i>TSC2</i>              | c.1513C>T p.(Arg505*)                        | TS        | DS         | 0                     | 0                | 1.6                                                                  | Novel                  |
| F46 | FCD type IIB                                                   | F   | 14y          | Focal motor at Rt face, w weekly                                          | 39y              | Lt frontal                  | 39y            | Somatic          | <i>MTOR</i>              | c.4376C>A p.(Ala1459Asp)                     | TS        | ddPCR      | 0.007                 | 0                | 2.56                                                                 | Reported               |
| F49 | FCD type IIB                                                   | F   | 3y           | FIAS, monthly to w weekly                                                 | 4y               | Lt parietooccipital         | 5y             | Somatic          | <i>TSC2</i>              | c.5228G>A p.(Arg1743Gln)                     | TS        | DS         | 0.1                   | 0.1 <sup>c</sup> | 1.3                                                                  | Reported               |
| F50 | FCD type IIB                                                   | M   | 6y           | FIAS, daily                                                               | 25y              | Lt parietal                 | 25y            | Somatic          | <i>MTOR</i>              | c.5930C>A p.(Thr1977Lys)                     | TS        | DS         | 0                     | 0                | 2.6                                                                  | Reported               |
| F54 | FCD type IIB                                                   | F   | 13y          | FIAS, daily                                                               | 53y              | Rt frontal                  | 53y            | Somatic          | <i>MTOR</i>              | c.4379T>C p.(Leu1460Pro)                     | TS        | ddPCR      | 0                     | 0                | 1.84                                                                 | Reported               |
| F57 | FCD type IIB                                                   | M   | 6y           | FBTCS, focal motor, w weekly                                              | 15y              | Lt parietal                 | 15y            | Somatic          | <i>MTOR</i>              | c.6644C>A p.(Ser2215Tyr)                     | TS        | ddPCR      | 0                     | 0                | 3.18                                                                 | Reported               |
| F61 | FCD type IIB                                                   | F   | 1y           | FIAS, w weekly                                                            | 2y               | Rt frontotemporal           | 2y             | Somatic          | <i>TSC2</i>              | c.4375C>T p.(Arg1459*)                       | TS        | DS         | 0                     | 0                | 0.6                                                                  | Novel                  |
|     |                                                                |     |              |                                                                           |                  |                             |                | Germline         | <i>TSC2</i>              | c.4960G>A p.(Gly1654Ser)                     | TS        | Sanger     | NA                    | NA               | NA                                                                   | Novel                  |
| F64 | FCD type IIB                                                   | F   | 53y          | FIAS w weekly                                                             | 56y              | Rt parietal & frontal       | 57y            | Somatic          | <i>MTOR</i>              | c.4448G>A p.(Cys1483Tyr)                     | TS        | DS         | 0                     | NA               | 4                                                                    | Reported               |
| F68 | FCD type IIB, TSC                                              | F   | 2m           | Epileptic spasms, hourly                                                  | 9m               | Lt occipital                | 9m             | Somatic          | <i>TSC2</i>              | c.1418_1422del p.(Leu473Hfsfs*7)             | TS        | DS/ ASP    | 0                     | 0.03-0.4         | 3.6                                                                  | Novel                  |
| F26 | FCD type IB                                                    | F   | 0m           | Focal motor, daily                                                        | 1y               | Bilateral, Rt side dominant | 1y3m           | Somatic          | <i>AKT3</i>              | c.49G>A p.(Glu17Lys)                         | WES       | DS         | 0                     | 0                | 4.9                                                                  | Reported               |
| F32 | FCD type IB                                                    | M   | 2y           | Staring, daily                                                            | 12y              | Lt parahippocampal          | 13y            | Somatic          | <i>BRAF</i>              | c.1799T>A p.(Val600Glu)                      | TS        | DS         | 1                     | 0.3 <sup>e</sup> | 7.5                                                                  | Reported               |
| F45 | FCD type I                                                     | F   | 4m           | Epileptic spasms, hourly                                                  | 1y11m            | Rt frontal                  | 1y11m          | Somatic          | <i>SLC35A2</i>           | c.844G>A p.(Gly282Arg)                       | WES       | DS         | 0.1                   | 0.1 <sup>c</sup> | 5.4                                                                  | Novel                  |
| F48 | FCD type IB                                                    | M   | 4y           | FIAS, FBTCS, monthly                                                      | 23y              | Rt hippocampus              | 23y            | Somatic          | <i>MAP2K1</i>            | c.173_187del p.(Gln58_Glu62del)              | TS        | DS         | 0                     | 0                | 0.8                                                                  | Novel                  |
| F67 | FCD type I                                                     | F   | 11y          | FIAS, w weekly                                                            | 18y (normal)     | Rt frontal                  | 20y            | Somatic          | <i>PTPN11</i>            | c.178G>C p.(Gly60Arg)                        | WES       | DS         | 0.1                   | 0.1 <sup>c</sup> | 2.3                                                                  | Novel                  |
| F29 | MCD                                                            | M   | 3d           | Focal motor, hourly                                                       | 3d               | Bilateral, Rt side dominant | 2m             | Somatic          | <i>MTOR</i>              | c.4379T>C p.(Leu1460Pro)                     | WES       | ddPCR      | 0                     | 0                | 2.3                                                                  | Reported               |
| F39 | FCD type IIB (Ganglioglioma and FCD type IA)                   | M   | 3m           | Focal motor, daily                                                        | 5m               | Rt temporal                 | 5m             | Somatic          | <i>BRAF</i>              | c.1799T>A p.(Val600Glu)                      | TS        | DS         | 0                     | 0                | 0 (temporal lobe), 29.1 (amygdala)                                   | Reported               |
| F70 | Ganglioglioma                                                  | M   | 18y          | FBTCS, monthly                                                            | 21y              | Lt temporal                 | 21y            | Somatic          | <i>SV</i>                | chr 9 del ( <i>TSC1</i> )                    | WES       | CMA        | 0 (2 copies)          | 0 (2copies)      | 15-20 (1.6-1.7 copies)                                               | Reported               |
| F30 | Hippocampal sclerosis                                          | M   | 6m           | Focal motor w with eye deviation to the right, daily                      | 2y7m             | Rt hippocampus              | 4y             | Somatic          | <i>SV</i>                | 19p13.3p12 del                               | CMA       | ddPCR      | 0 (2 copies)          | 0 (2 copies)     | 20 (1.7 copies)                                                      | Novel                  |
| F63 | No remarkable change (insufficient sample volume) <sup>a</sup> | M   | 2m           | FIAS                                                                      | 1y4m             | Lt parietal                 | 1y11m          | Germline         | <i>NPRL3</i>             | c.1270C>T p.(Arg424*)                        | TS        | Sanger     | NA                    | NA               | NA                                                                   | Reported               |

ASP = allele specific PCR; CMA = chromosomal microarray; ddPCR = droplet digital PCR; DS = amplicon deep sequencing; FAS = Focal aware seizure; FBTCS = focal to bilateral tonic-clonic seizure; FIAS = focal impaired awareness seizure; Lt = left; NA = not available; Rt = right; TS = targeted sequencing; VAF = variant allele frequency; WES = whole-exome sequencing.

<sup>a</sup>clinically suspected FCD. <sup>b</sup>*TUBB3* abnormality causes cortical dysplasia, complex, w with other brain malformations 1 w with autosomal dominant inheritance (OMIM# 614039). <sup>c</sup> These data were considered false positive due to similar error rates in the short-read sequencer (0.1%).<sup>1</sup>

Refseq accession number: *AKT3* (NM\_005465), *BRAF* (NM\_004333), *DEPDC5* (NM\_001242896), *MAP2K1* (NM\_002755), *MTOR* (NM\_004958), *NPRL3* (NM\_001077350), *PIK3CA* (NM\_006218), *PTPN11* (NM\_002834), *SLC35A2* (NM\_001042498), *TSC2* (NM\_000548), and *TUBB3* (NM\_006086).

**Table S3 Clinical summary and genetic variants in patients with hemimegalencephaly in this study**

| ID  | Pathological type                                              | Sex | Age at onset | Seizure type                                                   | Age at Brain MRI | Location of lesion | Age at surgery | Germline/Somatic | Gene          | Variant                  | Method    |            | VAF(%)  |                    |                                                                            | Reported/Novel variant |
|-----|----------------------------------------------------------------|-----|--------------|----------------------------------------------------------------|------------------|--------------------|----------------|------------------|---------------|--------------------------|-----------|------------|---------|--------------------|----------------------------------------------------------------------------|------------------------|
|     |                                                                |     |              |                                                                |                  |                    |                |                  |               |                          | Detection | Validation | Control | Blood              | Brain                                                                      |                        |
| M28 | No remarkable change (insufficient sample volume) <sup>a</sup> | F   | 1m           | Epileptic spasms, hourly                                       | 1m               | Lt hemisphere      | 4m             | Somatic          | <i>PIK3CA</i> | c.1624G>A p.(Glu542Lys)  | TS        | DS         | 0       | 0.2 <sup>b</sup>   | 34.9 (gyrus), 21.7 (heterotopia)                                           | Reported               |
| M29 | HME                                                            | M   | 1d           | Tonic seizures, hourly                                         | 2m               | Lt hemisphere      | 2m             | Somatic          | <i>PIK3CA</i> | c.1624G>A p.(Glu542Lys)  | TS        | DS         | 0       | 0                  | 27.2                                                                       | Reported               |
| M30 | atypical neuron, compatible w ith HME                          | M   | 20d          | FBTCS, weekly                                                  | 2m               | Rt hemisphere      | 5m             | Somatic          | <i>MTOR</i>   | c.6644C>T p.(Ser2215Phe) | TS        | ddPCR      | 0.025   | 0.016 <sup>b</sup> | 16.28                                                                      | Reported               |
| M44 | - <sup>a</sup>                                                 | M   | 0d           | Tonic or clonic seizures in cluster                            | 1y2m             | Lt hemisphere      | 1y2m           | Somatic          | <i>MTOR</i>   | c.4348T>G p.(Tyr1450Asp) | TS        | DS         | 0       | NA                 | 6.2, 4.5, 4.2 (tumor like), 5.0 (HME cortex)                               | Reported               |
| M52 | - <sup>a</sup>                                                 | F   | 20d          | FBTCS, hourly                                                  | NA               | Lt hemisphere      | 9m             | Somatic          | <i>PIK3CA</i> | c.1633G>A p.(Glu545Lys)  | TS        | DS         | 0       | NA                 | 11.3                                                                       | Reported               |
| M53 | HME                                                            | F   | 1d           | Epileptic spasms, daily                                        | 2d               | Rt hemisphere      | 4m             | Somatic          | <i>PIK3CA</i> | c.3140A>G p.(His1047Arg) | TS        | DS         | 0       | 0                  | 16.8 (pars opercularis), 22.3 (temporal lobe), 15.2 (lipoma)               | Reported               |
| M54 | No remarkable change <sup>a</sup>                              | F   | 2d           | Focal motor, FBTCS, daily                                      | 11d              | Lt hemisphere      | 25d            | Somatic          | <i>AKT3</i>   | c.49G>A p.(Glu17Lys)     | TS        | DS         | 0       | 0                  | 1.1                                                                        | Reported               |
| M55 | HME                                                            | F   | 16d          | focal motor, epileptic spasms, daily                           | 1d               | Rt hemisphere      | 5m             | Somatic          | <i>PIK3CA</i> | c.1624G>A p.(Glu542Lys)  | TS        | DS         | 0       | 0                  | 25.4                                                                       | Reported               |
| M56 | Polymicrogyria, nodular heterotopia <sup>a</sup>               | M   | 0m           | Focal motor with eye deviation to the left daily, FBTCS, daily | 3m               | Lt hemisphere      | 4m             | Somatic          | <i>PIK3CA</i> | c.1633G>A p.(Glu545Lys)  | Sanger    | DS         | 0       | 0                  | 14.6, 11.9 (temporal lobe), 8.3 (Hippocampus), 7.1 (Amygdala), 14.3 (skin) | Reported               |

ddPCR = droplet digital PCR; DS = amplicon deep sequencing; FBTCS = focal to bilateral tonic-clonic seizure; FIAS = focal impaired awareness seizure; GTC = generalized tonic-clonic seizure; Lt = left; Rt = right; TS = targeted sequencing; VAF = variant allele frequency.

<sup>a</sup>Clinically HME, <sup>b</sup>These data were considered false positive because VAFs in the blood were smaller in controls as per ddPCR or similar to the error rate for the short-read sequencer (0.1%).<sup>1</sup>

Refseq accession number: *AKT3* (NM\_005465), *MTOR* (NM\_004958), *PIK3CA* (NM\_006218).

**Table S4 In-silico predictions of novel missense and in-frame variants identified in this study**

| ID  | Germline/<br>Somatic | Gene           | Variant                                          | SIFT |          | Polyphen2 | HumVar            | CADD | PROVEAN            |
|-----|----------------------|----------------|--------------------------------------------------|------|----------|-----------|-------------------|------|--------------------|
| F04 | Germline             | <i>TUBB3</i>   | NM_006086: c.520A>G p.(Lys174Glu)                | 0.01 | Damaging | 0.981     | Probably Damaging | 25   | NA                 |
| F08 | Somatic              | <i>MTOR</i>    | NM_004958: c.4339_4353del p.(Ala1447_Glu1451del) | NA   |          | NA        |                   | NA   | -31.56 Deleterious |
| F36 | Somatic              | <i>TSC2</i>    | NM_000548: c.2492C>T p.(Thr831Met)               | 0.01 | Damaging | 0.998     | Probably Damaging | 26.9 | NA                 |
| F41 | Somatic              | <i>TSC2</i>    | NM_000548: c.5227C>T p.(Arg1743Trp)              | 0.00 | Damaging | 0.999     | Probably Damaging | 25.6 | NA                 |
| F45 | Somatic              | <i>SLC35A2</i> | NM_001042498: c.844G>A p.(Gly282Arg)             | 0.03 | Damaging | 1.000     | Probably Damaging | 24.3 | NA                 |
| F48 | Somatic              | <i>MAP2K1</i>  | NM_002755: c.173_187del p.(Gln58_Glu62del)       | NA   |          | NA        |                   | NA   | -26.14 Deleterious |
| F61 | Germline             | <i>TSC2</i>    | NM_000548: c.4960G>A p.(Gly1654Ser)              | 0.01 | Damaging | 0.998     | Probably Damaging | 23.3 | NA                 |
| F67 | Somatic              | <i>PTPN11</i>  | NM_002834: c.178G>C p.(Gly60Arg)                 | 0.00 | Damaging | 0.997     | Probably Damaging | 29.1 | NA                 |

SIFT, <https://sift.bii.a-star.edu.sg/>; PolyPhen-2, <http://genetics.bwh.harvard.edu/pph2/>; CADD, <https://cadd.gs.washington.edu/>; PROVEAN, <https://www.jcvi.org/research/provean>

NA = not available

**Table S5 Somatic structural variations identified in this study**

| ID  | Whole-exome sequencing                                                                                                             | SNP array                                                                                       |                      |            |                            |
|-----|------------------------------------------------------------------------------------------------------------------------------------|-------------------------------------------------------------------------------------------------|----------------------|------------|----------------------------|
|     | Structural variations                                                                                                              | Structural variations                                                                           | CN state             | Size (Mb)  | Protein coding genes       |
| F30 | Not detected                                                                                                                       | arr[GRCh37] 5q34q35.3(167826913-180719788)x2 mos hmz,<br>19p13.3p12(260911-23765479)x1-2        | 2, 1.66 <sup>a</sup> | 12.9, 23.5 | 128, 596                   |
| F43 | seq[GRCh37]dup(17)(q21.1q25.3), del(22)(q12.1q13.33)<br>NC_000017.10:g.38140461-80963293dup<br>NC_000022.10:g.26936736-51143587del | arr[GRCh37] 17q12q25.3(37,623,726-81,041,938)x2-3,<br>22q11.23q13.33(24,995,260-51,197,838)x1-2 | 2.39, 1.53           | 43.4, 26.2 | 643, 310 ( <i>DEPDC5</i> ) |
| F70 | seq[GRCh37]del(9)(p24.1q34.3)<br>NC_000009.11:g.8465365-140347371del                                                               | arr[GRCh37] 9p24.3q21.31(203861_135775224)x1-2                                                  | 1.58-1.72            | 135        | 629 ( <i>TSC1</i> )        |

a 1.7 copy in ddPCR

SNP = single nucleotide polymorphism; CN = Copy number

## Supplementary references

- 1 Fox EJ, Reid-Bayliss KS, Emond MJ, Loeb LA (2014) Accuracy of Next Generation Sequencing Platforms. *Next Gener Seq Appl* 1: Doi 10.4172/jngsa.1000106
- 2 Kato M, Kada A, Shiraishi H, Tohyama J, Nakagawa E, Takahashi Y, Akiyama T, Kakita A, Miyake N, Fujita A et al (2022) Sirolimus for epileptic seizures associated with focal cortical dysplasia type II. *Ann Clin Transl Neurol* 9: 181-192 Doi 10.1002/acn3.51505
- 3 Nakashima M, Saitsu H, Takei N, Tohyama J, Kato M, Kitaura H, Shiina M, Shirozu H, Masuda H, Watanabe K et al (2015) Somatic Mutations in the MTOR gene cause focal cortical dysplasia type IIb. *Ann Neurol* 78: 375-386 Doi 10.1002/ana.24444
